# Supplementary material for: Transcriptional Profiles from Paired Normal Samples Offer Complementary Information on Cancer Patient Survival – Evidence from TCGA Pan-Cancer Data
Source: PubMed Central journal article supplement (PMC4738355; doi:10.1038/srep20567), 2016-02-03
Supplement: srep20567-s1.pdf [file srep20567-s1.pdf]

# **Transcriptional Profiles from Paired Normal Samples Offer Complementary Information on Cancer Patient Survival -- Evidence from TCGA Pan-Cancer Data**

Xiu Huang, David Stern, and Hongyu Zhao

## **Supplementary Materials**

Fig. S1. Diagram illustrating the analyses performed in this article.

Fig. S2. Rand indexes comparing groupings based on clinical or genetic features with those based on gene expression data of each data type.

Fig. S3. Boxplot comparing distributions of Out Of Bag Error Rate from 20 random runs for Random Forest survival model using different datasets for six cancer cohorts of the RNASeq data.

Fig. S4. Barplot of the similarity levels of the sample expression barcodes versus cell type specific barcodes defined by the gene expression barcode project.

Fig. S5. Barplot of the Rand indexes comparing stratifications using different types translational data and using clinical variables.

Fig. S6. Boxplot of the similarity levels of the sample expression barcodes versus cell type specific barcodes defined by the gene expression barcode project.

Table S1. Backer's Gamma index comparing grouping similarity of hierarchical clustering from each two of the tumor, normal and fold change data types.

Table S2. Detailed list of the clinical features' explanations and grouping structures.

Table S3. Detailed list of the four mutually exclusive gene set modules.

Table S4. Detailed list of the sample sizes of each category of patients according to the mutation patterns of the four driving modules in the 60 breast cancer patients' data.

Table S5. Number of patients bearing somatic mutations on key tumor driving genes in tumor samples, adjacent normal samples and both normal and tumor samples.

Table S6. Top 100 gene set signatures being differentially associated with survival.

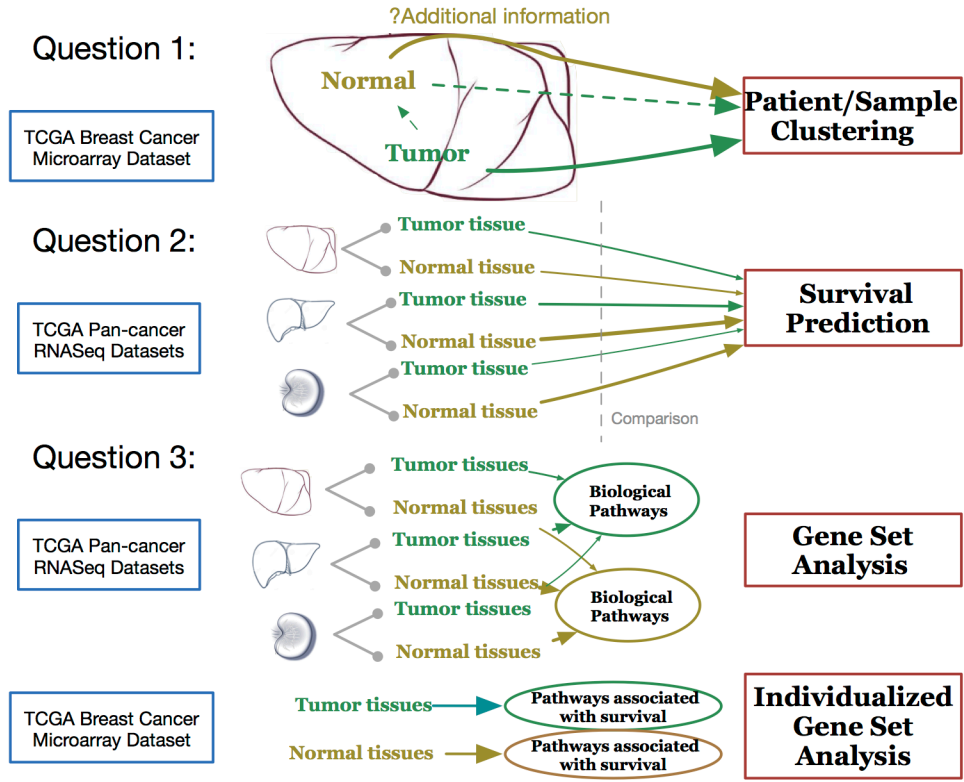

Fig. S1. Diagram illustrating the analyses performed in this article.

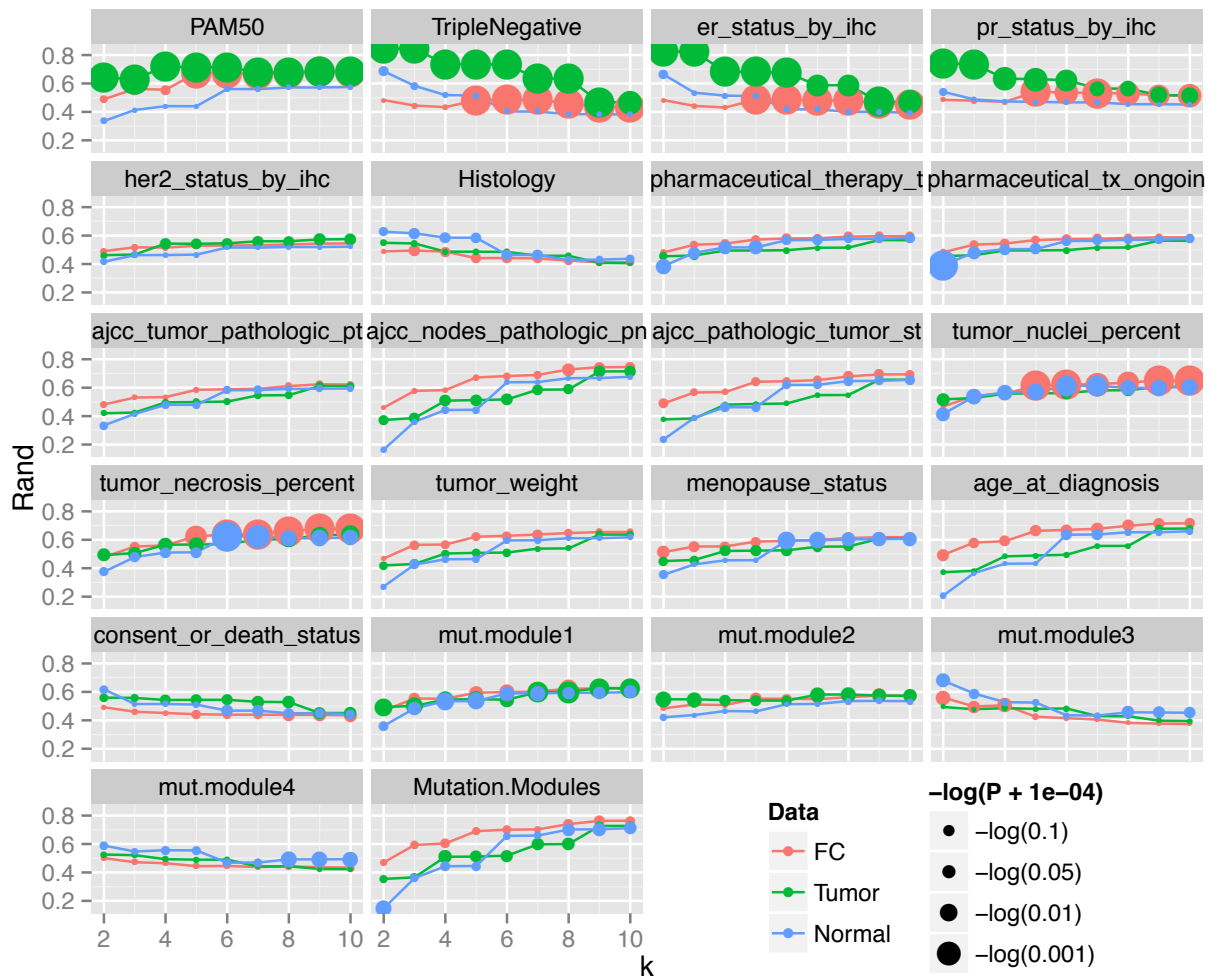

**Fig. S2. Rand indexes comparing groupings based on clinical or genetic features with those based on gene expression data of each data type.** In each panel, there are three curves representing the Rand index values for comparing clinical features with clusters derived from tumor samples (green), normal samples (blue), and expression level changes between tumor and normal samples (red) using 6,000 most varying genes, respectively. Different points of each curve correspond to clinical features clustered using k-means clustering where k is varied from 2 to 10. The statistical significance level of similarity is calculated from permutation and represented by the size of the filled circle.

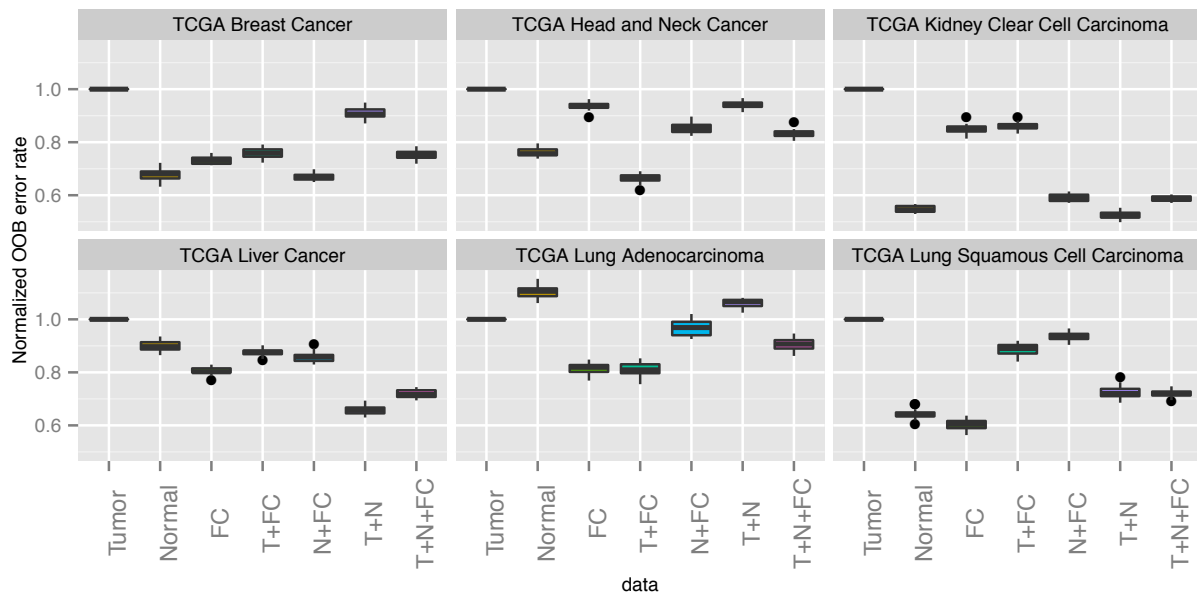

**Fig. S3. Boxplot comparing distributions of Out Of Bag Error Rate from 20 random runs for Random Forest survival model using different datasets for six cancer cohorts of the RNASeq data.**

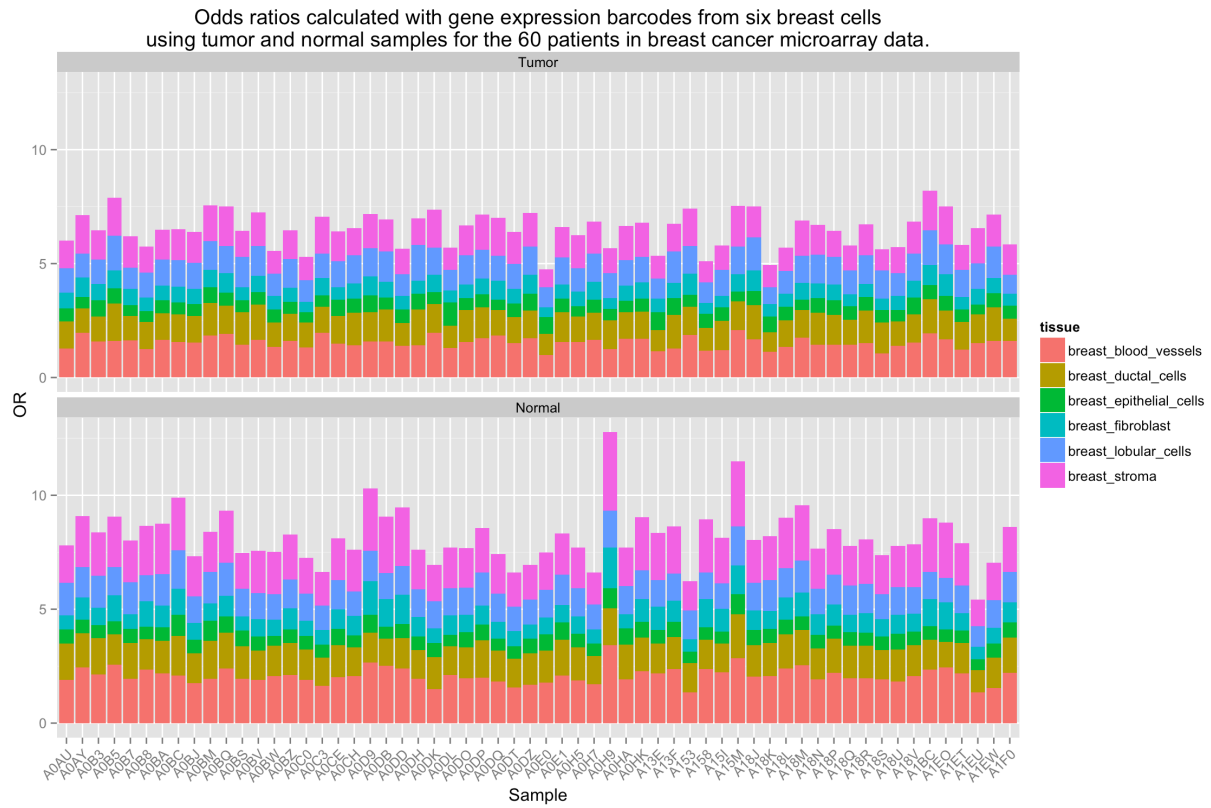

**Fig. S4. Barplot of the similarity levels of the sample expression barcodes versus cell type specific barcodes defined by the gene expression barcode project.**

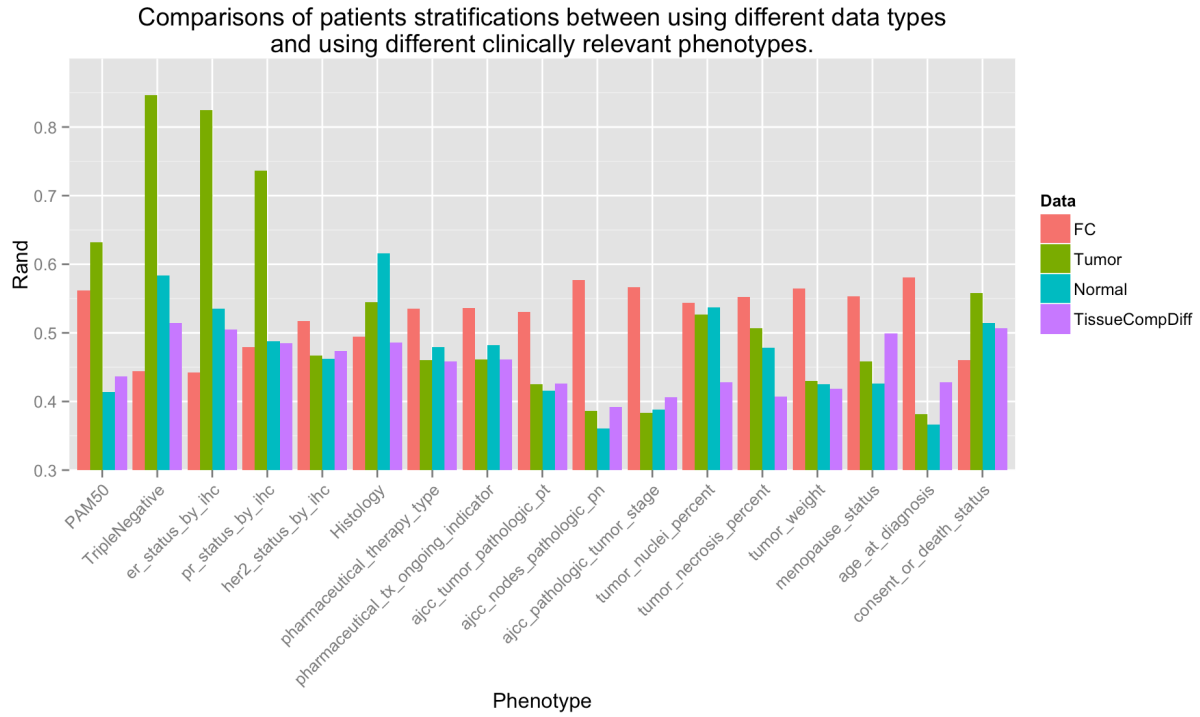

**Fig. S5. Barplot of the Rand indexes comparing stratifications using different types of translational data and using clinical variables.**

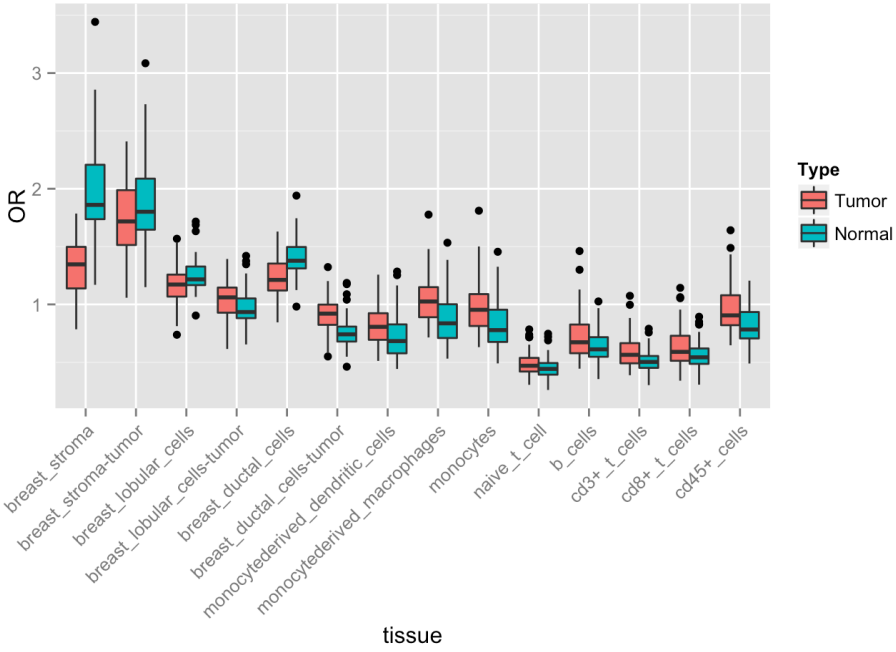

**Fig. S6. Boxplot of the similarity levels of the sample expression barcodes versus cell type specific barcodes defined by the gene expression barcode project.**

|                        | fc vs. tumor | fc vs. normal | tumor vs. normal |
|------------------------|--------------|---------------|------------------|
| <b>Top 1000 Genes</b>  | 0.13/0.04*   | 0.71/0*       | -0.04/0.695      |
| <b>Top 2000 Genes</b>  | 0.21/0.004*  | 0.31/0*       | -0.03/0.644      |
| <b>Top 3000 Genes</b>  | 0.09/0.105   | 0.28/0*       | -0.06/0.79       |
| <b>Top 4000 Genes</b>  | 0.16/0.021*  | 0.26/0*       | -0.07/0.831      |
| <b>Top 5000 Genes</b>  | 0.18/0.013*  | 0.26/0*       | -0.03/0.644      |
| <b>Top 6000 Genes</b>  | 0.14/0.032*  | 0.28/0*       | -0.05/0.748      |
| <b>Top 7000 Genes</b>  | 0.15/0.024*  | 0.23/0.002*   | -0.03/0.644      |
| <b>Top 8000 Genes</b>  | 0.43/0*      | 0.49/0*       | -0.04/0.695      |
| <b>Top 9000 Genes</b>  | 0.31/0*      | 0.3/0*        | -0.03/0.644      |
| <b>Top 10000 Genes</b> | 0.43/0*      | 0.45/0*       | -0.02/0.572      |
| <b>Top 11000 Genes</b> | 0.48/0*      | 0.47/0*       | -0.01/0.521      |
| <b>Top 12000 Genes</b> | 0.12/0.054   | 0.69/0*       | -0.05/0.748      |
| <b>Top 13000 Genes</b> | 0.22/0.002*  | 0.6/0*        | -0.06/0.79       |
| <b>Top 14000 Genes</b> | 0.41/0*      | 0.47/0*       | -0.04/0.695      |
| <b>Top 15000 Genes</b> | 0.24/0.002*  | 0.6/0*        | -0.05/0.748      |
| <b>Top 16000 Genes</b> | 0.24/0.002*  | 0.62/0*       | -0.05/0.748      |
| <b>Top 17000 Genes</b> | 0.24/0.002*  | 0.62/0*       | -0.05/0.748      |
| <b>Top 18000 Genes</b> | 0.25/0.001*  | 0.62/0*       | -0.05/0.748      |

**Table S1. Backer's Gamma index comparing grouping similarity of hierarchical clustering from each two of the tumor, normal and fold change data types.** Each entry in the table shows both the index value and the statistical significance of the similarity between the two clusters, i.e. smaller p-values indicating evidence suggesting similarity.



| Clinical features                   | Explanation                                                                                     | Categorical sample size                                                                                            |
|-------------------------------------|-------------------------------------------------------------------------------------------------|--------------------------------------------------------------------------------------------------------------------|
| PAM50                               | A 50-gene-expression signature.                                                                 | 10 Basal; 4 Her2; 31 LumA; 13 LumB, 2 NA.                                                                          |
| TripleNegative                      | Breast cancer that does not express ER, PR and Her2.                                            | 8 TripleNegative; 50 Non-TripleNegative; 2 NA.                                                                     |
| ER status                           | Estrogene receptor status by immunohistochemistry.                                              | 49 Positive; 9 Negative; 1 Indeterminate; 1 NA.                                                                    |
| PR status                           | Progesterone receptor status by immunohistochemistry.                                           | 42 Positive; 16 Negative; 1 Indeterminate; 1 NA.                                                                   |
| HER2 status                         | Human epidermal growth factor receptor 2 status by immunohistochemistry.                        | 10 Positive; 37 Negative; 8 Equivocal; 5 NA.                                                                       |
| Histology                           | Sample histological type.                                                                       | 48 Infiltrating ductal carcinoma; 4 Infiltrating Lobular Carcinoma; 1 Mucinous Carcinoma; 5 Mixed histology; 2 NA. |
| Pharmaceutical therapy type         |                                                                                                 | 11 Chemotherapy; 18 Hormone Therapy; 1 Chemotherapy or Hormone Therapy; 30 NA.                                     |
| Pharmaceutical tx ongoing indicator | Indicator of whether the pharmaceutical treatment is still ongoing.                             | 18 Yes; 12 No; 30 NA.                                                                                              |
| AJCC tumor pathologic type          | Tumor pathologic type classified by the American Joint Committee on Cancer (AJCC) system.       | 4 T1; 1 T1a; 1 T1b; 14 T1c; 30 T2; 1 T2b; 8 T3; 1 T4b.                                                             |
| AJCC nodes pathologic type          | Lymph nodes pathologic type classified by the American Joint Committee on Cancer (AJCC) system. | 14 N0; 11 N0(i-); 7 N1; 13 N1a; 4 N1b; 2N1c; 2 N1mi; 1 N2; 3 N2a; 1 N3; 2 N3a.                                     |
| AJCC pathologic tumor stage         | Pathologic tumor stage classified by the American Joint Committee on Cancer (AJCC) system.      | 12 Stage I; 1 Stage IA; 19 Stage IIA; 16 Stage IIB; 8 Stage IIIA; 3 Stage IIIC; 1 Stage IV.                        |
| Tumor nuclei percent                | Percentage of tumor cells in the sample.                                                        | 2 60; 36 70; 3 75; 9 80; 3 85; 4 90; 3 95.                                                                         |
| Tumor necrosis percent              | Percentage of cell death in the sample.                                                         | 13 0; 1 1; 2 2; 6 5; 4 10; 1 15; 33 30.                                                                            |
| Tumor weight                        |                                                                                                 | 11 ( , 200); 25 [200,400); 15 [400,600); 3 [600,800); 4 [800,1000); 2 [1000, ).                                    |
| Menopause status                    |                                                                                                 | 19 Pre; 1 Peri; 28 Post; 1                                                                                         |

|                         |  |                                                                       |
|-------------------------|--|-----------------------------------------------------------------------|
|                         |  | Indeterminate; 11 NA.                                                 |
| Age at diagnosis        |  | 6 [0,40); 15 [40,50); 15 [50,60);<br>14 [60,70); 6 [70,80); 4 [80, ). |
| Consent or death status |  | 46 Consented; 14 Deceased.                                            |

**Table S2. Detailed list of the clinical features considered and grouping structures.** The clinical features were used to group the 60 breast cancer patients into subgroups and these subgroups were compared with the groupings from hierarchical clustering using transcriptional data of tumor samples, normal samples and fold changes respectively to evaluate the clinical relevance of transcriptional signals from each source.

| Module Name | Genes in the module                           | Categorical sample size                                                                                                                                                                                                              |
|-------------|-----------------------------------------------|--------------------------------------------------------------------------------------------------------------------------------------------------------------------------------------------------------------------------------------|
| Module 1    | PTEN, AKT1, PIK3CA, PIK3R1, 12p3.33(A), HIF3A | 2 with PTEN mutated; 2 with AKT1 mutated; 25 with PIK3CA mutated; 1 with PIK3R1 mutated; 2 with 12p3.33(A) mutated; 1 with 12p13.33(A) and HIF3A both mutated; 1 with PTEN and PIK3R1 both mutated; 26 with this module not mutated. |
| Module 2    | TP53, CDH1, GATA3, CTCF, GPRIN2               | 16 with TP53 mutated; 2 with CDH1 mutated; 4 with GATA3 mutated; 1 with CTCF mutated; 1 with GPRIN2 mutated; 36 with this module not mutated.                                                                                        |
| Module 3    | MAP2K4(D), MAP3K1, PPEF1, WWP2, SMARCA4       | 4 with MAP2K4(D) mutated; 6 with MAP3K1 mutated; 1 with WWP2 mutated; 1 with SMARCA4 mutated; 48 with this module not mutated.                                                                                                       |
| Module 4    | CCDN1(A), RB1, MAP2K4, GRID1                  | 9 with CCDN1(A) mutated; 1 with RB1 mutated; 3 with MAP2K4 mutated; 1 with GRID1 mutated; 46 with this module not mutated.                                                                                                           |

**Table S3. Detailed list of the four mutually exclusive gene set modules.**

|                    |      |      |      |      |      |      |      |
|--------------------|------|------|------|------|------|------|------|
|                    | 0000 | 0001 | 0010 | 0011 | 0101 | 0110 | 0111 |
| Number of patients | 2    | 2    | 2    | 5    | 2    | 7    | 14   |
|                    | 1000 | 1001 | 1011 | 1101 | 1110 | 1111 |      |
| Number of patients | 1    | 2    | 10   | 3    | 2    | 8    |      |

**Table S4. Detailed list of the sample size of each category of patients according to the mutation patterns of the four driving modules in the 60 breast cancer patients' data.**

|        | Number of patients bearing tumor only mutations | Number of patients bearing adjacent normal only mutations | Number of patients bearing mutations in both tissues |
|--------|-------------------------------------------------|-----------------------------------------------------------|------------------------------------------------------|
| PIK3CA | 12                                              | 0                                                         | 1                                                    |
| TP53   | 8                                               | 3                                                         | 1                                                    |
| CDH1   | 4                                               | 0                                                         | 0                                                    |
| MAP3K1 | 2                                               | 0                                                         | 0                                                    |
| MAP2K4 | 2                                               | 0                                                         | 2                                                    |

**Table S5. Number of patients bearing somatic mutations on key tumor driving genes in tumor samples, adjacent normal samples and both normal and tumor samples.**

|      | Immune Signatures                                           |                      |
|------|-------------------------------------------------------------|----------------------|
|      | Normal Associated                                           |                      |
| Rank | GeneSet                                                     | p_Tumor/<br>p_Normal |
| 1    | GSE17721_LPS_VS_GARDIQUIMOD_2H_BMDM_UP                      | 360                  |
| 2    | GSE17721_CTRL_VS_LPS_1H_BMDM_DN                             | 291                  |
| 3    | GSE18148_CBFK_KO_VS_WT_TREG_DN                              | 289                  |
| 4    | GSE17721_CTRL_VS_GARDIQUIMOD_4H_BMDM_DN                     | 249                  |
| 5    | GSE1432_CTRL_VS_IFNG_1H_MICROGLIA_DN                        | 248                  |
| 6    | GSE18791_CTRL_VS_NEWCASTLE_VIRUS_DC_2H_DN                   | 217                  |
| 7    | GSE360_L_DONOVANI_VS_L_MAJOR_DC_UP                          | 211                  |
| 8    | GSE22886_TH1_VS_TH2_12H_ACT_DN                              | 165                  |
| 9    | GSE17721_CTRL_VS_LPS_4H_BMDM_DN                             | 161                  |
| 10   | GSE27786_LSK_VS_ERYTHROBLAST_DN                             | 159                  |
| 11   | GSE3982_CTRL_VS_LPS_1H_NEUTROPHIL_UP                        | 150                  |
| 12   | GSE7460_TREG_VS_TCONV_ACT_WITH_TGFB_UP                      | 146                  |
| 13   | GSE7460_TREG_VS_TCONV_ACT_UP                                | 112                  |
| 14   | GSE17721_CTRL_VS_CPG_1H_BMDM_DN                             | 110                  |
| 15   | GSE20715_0H_VS_24H_OZONE_LUNG_DN                            | 108                  |
| 16   | GSE1460_DP_THYMOCYTE_VS_THYMIC_STROMAL_CELL_DN              | 84                   |
| 17   | GSE29614_DAY3_VS_DAY7_TIV_FLU_VACCINE_PBMC_UP               | 78                   |
| 18   | GSE29615_CTRL_VS_DAY3_LAIV_IFLU_VACCINE_PBMC_UP             | 69                   |
| 19   | GSE20366_EX_VIVO_VS_DEC205_CONVERSION_NAIVE_CD4_TCELL_DN    | 61                   |
| 20   | GSE18791_CTRL_VS_NEWCASTLE_VIRUS_DC_12H_DN                  | 61                   |
| 21   | GSE20366_EX_VIVO_VS_DEC205_CONVERSION_DN                    | 60                   |
| 22   | GSE17721_0.5H_VS_4H_LPS_BMDM_DN                             | 55                   |
| 23   | GSE18791_CTRL_VS_NEWCASTLE_VIRUS_DC_10H_DN                  | 54                   |
| 24   | GSE24081_CONTROLLER_VS_PROGRESSOR_HIV_SPECIFIC_CD8_TCELL_UP | 53                   |
| 25   | GSE2826_WT_VS_XID_BCELL_DN                                  | 50                   |
| 26   | GSE13484_UNSTIM_VS_3H_YF17D_VACCINE_STIM_PBMC_DN            | 47                   |
| 27   | GSE13411_NAIVE_VS_SWITCHED_MEMORY_BCELL_UP                  | 46                   |
| 28   | GSE11924_TH1_VS_TH2_CD4_TCELL_DN                            | 45                   |
| 29   | GSE360_T_GONDII_VS_M_TUBERCULOSIS_MAC_DN                    | 45                   |
| 30   | GSE7460_WT_VS_FOXP3_HET_ACT_WITH_TGFB_TCONV_DN              | 45                   |
| 31   | GSE37416_CTRL_VS_3H_F_TULARENSIS_LVS_NEUTROPHIL_DN          | 44                   |
| 32   | GSE9988_LOW_LPS_VS_CTRL_TREATED_MONOCYTE_UP                 | 43                   |
| 33   | GSE29618_PRE_VS_DAY7_POST_LAIV_FLU_VACCINE_PDC_UP           | 42                   |
| 34   | GSE17974_IL4_AND_ANTI_IL12_VS_UNTREATED_1H_ACT_CD4_TC       | 41                   |

|    | ELL_UP                                                       |    |
|----|--------------------------------------------------------------|----|
| 35 | GSE17974_0H_VS_0.5H_IN_VITRO_ACT_CD4_TCELL_DN                | 39 |
| 36 | GSE2706_R848_VS_R848_AND_LPS_8H_STIM_DC_DN                   | 39 |
| 37 | GSE17721_CTRL_VS_PAM3CSK4_6H_BMDM_DN                         | 38 |
| 38 | GSE17974_IL4_AND_ANTI_IL12_VS_UNTREATED_6H_ACT_CD4_TCELL_DN  | 38 |
| 39 | GSE2706_2H_VS_8H_R848_STIM_DC_DN                             | 38 |
| 40 | GSE17721_CTRL_VS_POLYIC_1H_BMDM_DN                           | 36 |
| 41 | GSE17580_UNINFECTED_VS_S_MANSONI_INF_TREG_DN                 | 35 |
| 42 | GSE39820_CTRL_VS_IL1B_IL6_CD4_TCELL_DN                       | 33 |
| 43 | GSE17721_LPS_VS_POLYIC_2H_BMDM_UP                            | 33 |
| 44 | GSE2706_LPS_VS_R848_AND_LPS_8H_STIM_DC_DN                    | 32 |
| 45 | GSE9037_CTRL_VS_LPS_1H_STIM_IRAK4_KO_BMDM_DN                 | 31 |
| 46 | GSE20366_CD103_POS_VS_NEG_TREG_KLRG1NEG_DN                   | 31 |
| 47 | GSE13411_NAIVE_VS_IGM_MEMORY_BCELL_UP                        | 30 |
| 48 | GSE17721_CTRL_VS_GARDIQUIMOD_1H_BMDM_DN                      | 30 |
| 49 | GSE20366_TREG_VS_TCONV_UP                                    | 28 |
| 50 | GSE360_L_MAJOR_VS_M_TUBERCULOSIS_MAC_DN                      | 26 |
| 51 | GSE17974_IL4_AND_ANTI_IL12_VS_UNTREATED_48H_ACT_CD4_TCELL_DN | 26 |
| 52 | GSE17721_PAM3CSK4_VS_GADIQUIMOD_1H_BMDM_UP                   | 26 |
| 53 | GSE27786_LIN_NEG_VS_ERYTHROBLAST_DN                          | 25 |
| 54 | GSE22886_CD8_VS_CD4_NAIVE_TCELL_UP                           | 25 |
| 55 | GSE36392_TYPE_2_MYELOID_VS_MAC_IL25_TREATED_LUNG_UP          | 25 |
| 56 | GSE2706_R848_VS_R848_AND_LPS_2H_STIM_DC_DN                   | 25 |
| 57 | GSE360_CTRL_VS_B_MALAYI_LOW_DOSE_DC_UP                       | 25 |
| 58 | GSE7460_FOXP3_MUT_VS_WT_ACT_WITH_TGFB_TCONV_UP               | 25 |
| 59 | GSE7460_CTRL_VS_FOXP3_OVEREXPR_TCONV_DN                      | 24 |
| 60 | GSE17721_LPS_VS_CPG_2H_BMDM_UP                               | 24 |
| 61 | GSE17721_CPG_VS_GARDIQUIMOD_24H_BMDM_DN                      | 23 |
| 62 | GSE9988_ANTI_TREM1_VS_LPS_MONOCYTE_DN                        | 23 |
| 63 | GSE1448_CTRL_VS_ANTI_VALPHA2_DP_THYMOCYTE_DN                 | 23 |
| 64 | GSE9988_LPS_VS_CTRL_TREATED_MONOCYTE_UP                      | 22 |
| 65 | GSE22886_CD4_TCELL_VS_BCELL_NAIVE_DN                         | 22 |
| 66 | GSE27786_NKTCELL_VS_ERYTHROBLAST_DN                          | 22 |
| 67 | GSE29615_CTRL_VS_LAIV_FLU_VACCINE_PBMC_UP                    | 22 |
| 68 | GSE29617_CTRL_VS_TIV_FLU_VACCINE_PBMC_2008_UP                | 21 |
| 69 | GSE13484_12H_UNSTIM_VS_YF17D_VACCINE_STIM_PBMC_DN            | 21 |
| 70 | GSE360_L_DONOVANI_VS_L_MAJOR_DC_DN                           | 21 |
| 71 | GSE22886_NAIVE_CD4_TCELL_VS_NEUTROPHIL_DN                    | 21 |
| 72 | GSE2706_UNSTIM_VS_8H_LPS_AND_R848_DC_DN                      | 21 |

|      |                                                                  |                      |
|------|------------------------------------------------------------------|----------------------|
| 73   | GSE18791_UNSTIM_VS_NEWCATSLE_VIRUS_DC_10H_DN                     | 20                   |
| 74   | GSE9988_LOW_LPS_VS_VEHICLE_TREATED_MONOCYTE_UP                   | 20                   |
| 75   | GSE360_HIGH_DOSE_B_MALAYI_VS_M_TUBERCULOSIS_DC_DN                | 20                   |
| 76   | GSE22886_NAIVE_CD8_TCELL_VS_NEUTROPHIL_DN                        | 20                   |
| 77   | GSE9988_ANTI_TREM1_VS_ANTI_TREM1_AND_LPS_MONOCYTE_D<br>N         | 20                   |
| 78   | GSE17721_0.5H_VS_24H_CPG_BMDM_DN                                 | 20                   |
| 79   | GSE7460_FOXP3_MUT_VS_WT_ACT_TCONV_UP                             | 20                   |
| 80   | GSE14000_UNSTIM_VS_4H_LPS_DC_UP                                  | 19                   |
| 81   | GSE1460_NAIVE_CD4_TCELL_CORD_BLOOD_VS_THYMIC_STROMA<br>L_CELL_DN | 19                   |
| 82   | GSE17721_POLYIC_VS_CPG_0.5H_BMDM_DN                              | 19                   |
| 83   | GSE360_L_MAJOR_VS_B_MALAYI_LOW_DOSE_DC_UP                        | 19                   |
| 84   | GSE9650_EFFECTOR_VS_EXHAUSTED_CD8_TCELL_DN                       | 18                   |
| 85   | GSE17580_TREG_VS_TEFF_S_MANSONI_INF_UP                           | 18                   |
| 86   | GSE2706_UNSTIM_VS_8H_R848_DC_DN                                  | 18                   |
| 87   | GSE26928_EFF_MEMORY_VS_CXCR5_POS_CD4_TCELL_DN                    | 17                   |
| 88   | GSE13306_RA_VS_UNTREATED_TCONV_DN                                | 17                   |
| 89   | GSE2706_UNSTIM_VS_2H_R848_DC_DN                                  | 17                   |
| 90   | GSE17721_CTRL_VS_CPG_4H_BMDM_DN                                  | 17                   |
| 91   | GSE17974_CTRL_VS_ACT_IL4_AND_ANTI_IL12_1H_CD4_TCELL_DN           | 17                   |
| 92   | GSE3982_BASOPHIL_VS_NKCELL_UP                                    | 16                   |
| 93   | GSE2706_R848_VS_LPS_2H_STIM_DC_DN                                | 16                   |
| 94   | GSE32423_CTRL_VS_IL7_MEMORY_CD8_TCELL_DN                         | 16                   |
| 95   | GSE13306_TREG_VS_TCONV_LAMINA_PROPRIA_UP                         | 16                   |
| 96   | GSE339_EX_VIVO_VS_IN_CULTURE_CD4POS_DC_DN                        | 16                   |
| 97   | GSE9650_NAIVE_VS_EXHAUSTED_CD8_TCELL_DN                          | 16                   |
| 98   | GSE9988_LPS_VS_VEHICLE_TREATED_MONOCYTE_UP                       | 15                   |
| 99   | GSE11924_TH2_VS_TH17_CD4_TCELL_UP                                | 15                   |
| 100  | GSE360_L_MAJOR_VS_B_MALAYI_HIGH_DOSE_MAC_UP                      | 15                   |
|      | Immunology Signature                                             |                      |
|      | Tumor Associated                                                 |                      |
| Rank | GeneSet                                                          | p_Normal/<br>p_Tumor |
| 1    | GSE17721_POLYIC_VS_PAM3CSK4_2H_BMDM_UP                           | 422                  |
| 2    | GSE37416_CTRL_VS_6H_F_TULARENSIS_LVS_NEUTROPHIL_UP               | 111                  |
| 3    | GSE27786_LIN_NEG_VS_ERYTHROBLAST_UP                              | 59                   |
| 4    | GSE27786_CD4_TCELL_VS_NKCELL_DN                                  | 56                   |
| 5    | GSE17721_POLYIC_VS_GARDIQUIMOD_4H_BMDM_DN                        | 56                   |
| 6    | GSE17721_CTRL_VS_CPG_0.5H_BMDM_UP                                | 53                   |
| 7    | GSE360_HIGH_DOSE_B_MALAYI_VS_M_TUBERCULOSIS_DC_UP                | 50                   |



|    |                                                               |    |
|----|---------------------------------------------------------------|----|
| 8  | GSE11864_UNTREATED_VS_CSF1_IFNG_PAM3CYS_IN_MAC_UP             | 49 |
| 9  | GSE29617_DAY3_VS_DAY7_TIV_FLU_VACCINE_PBMC_2008_DN            | 49 |
| 10 | GSE17721_POLYIC_VS_GARDIQUIMOD_6H_BMDM_DN                     | 48 |
| 11 | GSE17721_CTRL_VS_PAM3CSK4_4H_BMDM_DN                          | 43 |
| 12 | GSE17721_POLYIC_VS_CPG_2H_BMDM_UP                             | 39 |
| 13 | GSE17974_0.5H_VS_72H_UNTREATED_IN_VITRO_CD4_TCELL_UP          | 36 |
| 14 | GSE360_CTRL_VS_M_TUBERCULOSIS_DC_UP                           | 35 |
| 15 | GSE17721_CTRL_VS_PAM3CSK4_12H_BMDM_UP                         | 34 |
| 16 | GSE17721_POLYIC_VS_PAM3CSK4_16H_BMDM_UP                       | 31 |
| 17 | GSE17721_POLYIC_VS_PAM3CSK4_6H_BMDM_DN                        | 30 |
| 18 | GSE1432_1H_VS_6H_IFNG_MICROGLIA_UP                            | 28 |
| 19 | GSE14769_UNSTIM_VS_240MIN_LPS_BMDM_UP                         | 25 |
| 20 | GSE17721_CPG_VS_GARDIQUIMOD_4H_BMDM_DN                        | 24 |
| 21 | GSE360_L_DONOVANI_VS_M_TUBERCULOSIS_DC_UP                     | 24 |
| 22 | GSE27786_LIN_NEG_VS_NEUTROPHIL_DN                             | 23 |
| 23 | GSE360_LOW_DOSE_B_MALAYI_VS_M_TUBERCULOSIS_DC_UP              | 23 |
| 24 | GSE17721_CTRL_VS_GARDIQUIMOD_1H_BMDM_UP                       | 23 |
| 25 | GSE36392_TYPE_2_MYELOID_VS_EOSINOPHIL_IL25_TREATED_LUNG_UP    | 22 |
| 26 | GSE17721_CTRL_VS_PAM3CSK4_2H_BMDM_UP                          | 21 |
| 27 | GSE3982_EOSINOPHIL_VS_CENT_MEMORY_CD4_TCELL_DN                | 20 |
| 28 | GSE17721_CTRL_VS_PAM3CSK4_8H_BMDM_DN                          | 20 |
| 29 | GSE13485_CTRL_VS_DAY21_YF17D_VACCINE_PBMC_UP                  | 20 |
| 30 | GSE2826_XID_VS_BTK_KO_BCELL_UP                                | 20 |
| 31 | GSE17721_0.5H_VS_12H_CPG_BMDM_UP                              | 19 |
| 32 | GSE339_CD8POS_VS_CD4CD8DN_DC_IN_CULTURE_DN                    | 18 |
| 33 | GSE32423_IL7_VS_IL4_MEMORY_CD8_TCELL_UP                       | 17 |
| 34 | GSE7852_THYMUS_VS_FAT_TCONV_UP                                | 17 |
| 35 | GSE27786_NKTCELL_VS_MONO_MAC_DN                               | 17 |
| 36 | GSE20366_EX_VIVO_VS_HOMEOSTATIC_CONVERSION_NAIVE_CD4_TCELL_UP | 16 |
| 37 | GSE17721_LPS_VS_GARDIQUIMOD_6H_BMDM_DN                        | 16 |
| 38 | GSE14308_TH17_VS_NAIVE_CD4_TCELL_DN                           | 16 |
| 39 | GSE17721_CTRL_VS_POLYIC_4H_BMDM_UP                            | 16 |
| 40 | GSE2826_WT_VS_XID_BCELL_UP                                    | 16 |
| 41 | GSE14308_TH2_VS_NATURAL_TREG_DN                               | 15 |
| 42 | GSE1460_DP_VS_CD4_THYMOCYTE_UP                                | 15 |
| 43 | GSE17721_LPS_VS_PAM3CSK4_8H_BMDM_DN                           | 15 |
| 44 | GSE17721_CTRL_VS_GARDIQUIMOD_6H_BMDM_UP                       | 15 |
| 45 | GSE17721_LPS_VS_PAM3CSK4_2H_BMDM_DN                           | 14 |
| 46 | GSE14308_TH2_VS_TH1_DN                                        | 14 |

|    |                                                                   |    |
|----|-------------------------------------------------------------------|----|
| 47 | GSE29618_PRE_VS_DAY7_POST_TIV_FLU_VACCINE_BCELL_DN                | 14 |
| 48 | GSE32423_IL7_VS_IL7_IL4_MEMORY_CD8_TCELL_UP                       | 14 |
| 49 | GSE12845_IGD_NEG_BLOOD_VS_NAIVE_TONSIL_BCELL_DN                   | 13 |
| 50 | GSE3982_MAC_VS_BASOPHIL_UP                                        | 13 |
| 51 | GSE8384_CTRL_VS_B_ABORTUS_4H_MAC_CELL_LINE_UP                     | 13 |
| 52 | GSE32423_MEMORY_VS_NAIVE_CD8_TCELL_IL7_IL4_DN                     | 13 |
| 53 | GSE29617_CTRL_VS_DAY3_TIV_FLU_VACCINE_PBMC_2008_UP                | 13 |
| 54 | GSE17721_PAM3CSK4_VS_GADIQUIMOD_2H_BMDM_DN                        | 12 |
| 55 | GSE15324_NAIVE_VS_ACTIVATED_ELF4_KO_CD8_TCELL_DN                  | 12 |
| 56 | GSE11924_TFH_VS_TH1_CD4_TCELL_UP                                  | 12 |
| 57 | GSE17721_0.5H_VS_4H_CPG_BMDM_UP                                   | 12 |
| 58 | GSE10094_LCMV_VS_LISTERIA_IND_EFF_CD4_TCELL_UP                    | 12 |
| 59 | GSE14308_NAIVE_CD4_TCELL_VS_INDUCED_TREG_DN                       | 12 |
| 60 | GSE11864_UNTREATED_VS_CSF1_IFNG_PAM3CYS_IN_MAC_DN                 | 11 |
| 61 | GSE27786_CD4_TCELL_VS_MONO_MAC_UP                                 | 11 |
| 62 | GSE9650_NAIVE_VS_EFF_CD8_TCELL_UP                                 | 11 |
| 63 | GSE17974_IL4_AND_ANTI_IL12_VS_UNTREATED_0.5H_ACT_CD4_T<br>CELL_UP | 11 |
| 64 | GSE37416_0H_VS_3H_F_TULARENSIS_LVS_NEUTROPHIL_DN                  | 11 |
| 65 | GSE14769_40MIN_VS_360MIN_LPS_BMDM_UP                              | 11 |
| 66 | GSE29618_PRE_VS_DAY7_POST_LAIV_FLU_VACCINE_PDC_DN                 | 11 |
| 67 | GSE39820_TGFBETA1_VS_TGFBETA3_IN_IL6_TREATED_CD4_TCEL<br>L_UP     | 11 |
| 68 | GSE7764_IL15_NK_CELL_24H_VS_SPLENOCYTE_DN                         | 11 |
| 69 | GSE17974_0.5H_VS_72H_IL4_AND_ANTI_IL12_ACT_CD4_TCELL_UP           | 11 |
| 70 | GSE360_L_DONOVANI_VS_B_MALAYI_HIGH_DOSE_DC_DN                     | 10 |
| 71 | GSE3982_MEMORY_CD4_TCELL_VS_TH2_DN                                | 10 |
| 72 | GSE2197_IMMUNOSUPPRESSIVE_DNA_VS_UNTREATEDIN_DC_DN                | 10 |
| 73 | GSE3982_DC_VS_NEUTROPHIL_UP                                       | 10 |
| 74 | GSE17721_0.5H_VS_24H_GARDIQUIMOD_BMDM_DN                          | 10 |
| 75 | GSE1460_DP_THYMOCYTE_VS_NAIVE_CD4_TCELL_CORD_BLOOD_<br>UP         | 10 |
| 76 | GSE17974_0H_VS_72H_IN_VITRO_ACT_CD4_TCELL_DN                      | 10 |
| 77 | GSE12845_NAIVE_VS_DARKZONE_GC_TONSIL_BCELL_DN                     | 10 |
| 78 | GSE37416_0H_VS_3H_F_TULARENSIS_LVS_NEUTROPHIL_UP                  | 10 |
| 79 | GSE27786_CD8_TCELL_VS_ERYTHROBLAST_UP                             | 10 |
| 80 | GSE17721_CTRL_VS_GARDIQUIMOD_2H_BMDM_UP                           | 10 |
| 81 | GSE12845_IGD_NEG_BLOOD_VS_PRE_GC_TONSIL_BCELL_DN                  | 10 |
| 82 | GSE9037_CTRL_VS_LPS_1H_STIM_IRAK4_KO_BMDM_UP                      | 10 |
| 83 | GSE15750_DAY6_VS_DAY10_EFF_CD8_TCELL_UP                           | 10 |
| 84 | GSE10239_NAIVE_VS_KLRG1HIGH_EFF_CD8_TCELL_DN                      | 9  |

|     |                                                        |   |
|-----|--------------------------------------------------------|---|
| 85  | GSE360_CTRL_VS_T_GONDII_MAC_UP                         | 9 |
| 86  | GSE15930_STIM_VS_STIM_AND_IFNAB_72H_CD8_T_CELL_DN      | 9 |
| 87  | GSE360_CTRL_VS_L_DONOVANI_DC_UP                        | 9 |
| 88  | GSE29618_LAIV_VS_TIV_FLU_VACCINE_DAY7_BCELL_DN         | 9 |
| 89  | GSE15659_CD45RA_NEG_CD4_TCELL_VS_ACTIVATED_TREG_UP     | 9 |
| 90  | GSE3982_CENT_MEMORY_CD4_TCELL_VS_TH2_DN                | 9 |
| 91  | GSE31082_DP_VS_CD4_SP_THYMOCYTE_UP                     | 9 |
| 92  | GSE29618_PRE_VS_DAY7_POST_LAIV_FLU_VACCINE_MONOCYTE_DN | 9 |
| 93  | GSE1448_ANTI_VALPHA2_VS_VBETA5_DP_THYMOCYTE_DN         | 9 |
| 94  | GSE6269_FLU_VS_STREP_AUREUS_INF_PBMC_UP                | 9 |
| 95  | GSE339_EX_VIVO_VS_IN_CULTURE_CD4POS_DC_UP              | 8 |
| 96  | GSE17580_TREG_VS_TEFF_UP                               | 8 |
| 97  | GSE37416_CTRL_VS_12H_F_TULARENSIS_LVS_NEUTROPHIL_UP    | 8 |
| 98  | GSE17721_LPS_VS_CPG_8H_BMDM_DN                         | 8 |
| 99  | GSE27786_LSK_VS_CD4_TCELL_UP                           | 8 |
| 100 | GSE14769_40MIN_VS_360MIN_LPS_BMDM_DN                   | 8 |

**Table S6. Top 100 gene set signatures differentially associated with survival.** The gene sets are defined either as ‘normal associated’ (more associated with survival using normal data) or ‘tumor associated’ (more associated with survival using tumor data). The gene set signatures are from the oncogenic signatures and immunology signatures defined by MSigDB.
